# Supplementary material for: Accelerated H2 activation over Pt/M-ZrO2 for the reductive amination of levulinic acid esters under benign conditions
Source: Royal Society of Chemistry journal article supplement (doi:10.1039/d2cy01550a), 2023-01-01
Supplement: d2cy01550a1.pdf [file d2cy01550a1.pdf]

**Accelerated H<sub>2</sub> activation over Pt/M-ZrO<sub>2</sub> for the reductive amination of levulinic acid esters under benign conditions**

Kanika Saini,<sup>[a]</sup> Sahil Kumar,<sup>[a]</sup> Ramandeep Kaur,<sup>[b]</sup> Srinivasarao Arulananda Babu<sup>[b]</sup>, and  
Shunmugavel Saravanamurugan\*<sup>[a]</sup>

<sup>a</sup> *Laboratory of Bioproduct Chemistry, Center of Innovative and Applied Bioprocessing,  
Sector-81 (Knowledge City), Mohali – 140 306, Punjab, India. Email: saravana@ciab.res.in*

<sup>b</sup> *Department of Chemical Sciences, Indian Institute of Science Education and Research  
(IISER) Mohali, Manauli P.O., Sector 81, SAS Nagar, Mohali, Knowledge City, Punjab  
140306, India.*

**Table S1.** Catalytic reductive amination of MLevu to OMP with metals supported on ZrO<sub>2</sub>.

| Entry | Catalyst              | MLevu          | OMP       | OMP             |
|-------|-----------------------|----------------|-----------|-----------------|
|       |                       | Conversion (%) | Yield (%) | Selectivity (%) |
| 1     | Ru/M-ZrO <sub>2</sub> | 97.9           | 18.0      | 18.4            |
| 2     | Ir/M-ZrO <sub>2</sub> | 98.0           | 32.1      | 32.8            |
| 3     | Ni/M-ZrO <sub>2</sub> | 89.1           | 6.2       | 6.9             |
| 4     | Mn/M-ZrO <sub>2</sub> | 95.5           | 22.8      | 23.8            |
| 5     | Ce/M-ZrO <sub>2</sub> | 94.9           | 10.2      | 10.8            |
| 6     | Co/M-ZrO <sub>2</sub> | 93.7           | 10.4      | 11.1            |
| 7     | Fe/M-ZrO <sub>2</sub> | 96.7           | 8.9       | 9.2             |

**Reaction Conditions:** 1 mmol MLevu, mole<sub>substrate:Pt</sub> = 81, 2 mmol octylamine, 19 ml methanol, 120 °C, 30 bar H<sub>2</sub>, 4 h.

**Table S2.** Physicochemical properties of parent and Pt incorporated ZrO<sub>2</sub> catalysts.

| Entry | Catalyst              | Surface area                     | Pore size         | Pore volume                       |
|-------|-----------------------|----------------------------------|-------------------|-----------------------------------|
|       |                       | (m <sup>2</sup> /g) <sup>a</sup> | (nm) <sup>b</sup> | (cm <sup>3</sup> /g) <sup>c</sup> |
| 1     | M-ZrO <sub>2</sub>    | 105                              | 17.5              | 0.423                             |
| 2     | Pt-M-ZrO <sub>2</sub> | 93                               | 17.4              | 0.393                             |
| 3     | T-ZrO <sub>2</sub>    | 45                               | 3.4               | 0.045                             |
| 4     | Pt-T-ZrO <sub>2</sub> | 6                                | 3.8               | 0.006                             |

<sup>a</sup>calculated from the BET method, <sup>b</sup>calculated from the BJH method, <sup>c</sup>obtained from the amount of N<sub>2</sub> adsorbed at a relative pressure of around 0.99.

**Table S3.** XPS data of parent and Pt incorporated ZrO<sub>2</sub> catalysts.

| Catalyst                      | O-1s           |                    |          | Pt-4f            |                    |          |
|-------------------------------|----------------|--------------------|----------|------------------|--------------------|----------|
|                               | Gaussian peak  | Peak Position (eV) | Area (%) | Gaussian peak    | Peak Position (eV) | Area (%) |
| M-ZrO <sub>2</sub>            | O <sub>L</sub> | 529.7              | 96.8     | Pt <sup>0</sup>  |                    |          |
|                               | O <sub>V</sub> | --                 | --       | Pt <sup>2+</sup> | --                 | --       |
|                               | O <sub>A</sub> | 532.4              | 3.1      | Pt <sup>4+</sup> |                    |          |
| T-ZrO <sub>2</sub>            | O <sub>L</sub> | 529.8              | 90.1     | Pt <sup>0</sup>  |                    |          |
|                               | O <sub>V</sub> | --                 | --       | Pt <sup>2+</sup> | --                 | --       |
|                               | O <sub>A</sub> | 531.9              | 9.8      | Pt <sup>4+</sup> |                    |          |
| Pt/M-ZrO <sub>2</sub>         | O <sub>L</sub> | 529.8              | 94.5     | Pt <sup>0</sup>  | 71.8, 75.5         | 25.5     |
|                               | O <sub>V</sub> | 531.8              | 2.5      | Pt <sup>2+</sup> | 73.5, 76.2         | 37.7     |
|                               | O <sub>A</sub> | 532.6              | 2.8      | Pt <sup>4+</sup> | 74.6, 77.9         | 36.7     |
| Reduced Pt/M-ZrO <sub>2</sub> | O <sub>L</sub> | 529.5              | 82.0     | Pt <sup>0</sup>  | 71.4, 75.3         | 46.5     |
|                               | O <sub>V</sub> | 531.3              | 15.3     | Pt <sup>2+</sup> | 72.8, 76.3         | 41.3     |
|                               | O <sub>A</sub> | 532.7              | 2.5      | Pt <sup>4+</sup> | 74.2, 78.8         | 12.1     |
| Pt/T-ZrO <sub>2</sub>         | O <sub>L</sub> | 529.8              | 90.1     | Pt <sup>0</sup>  | 71.3, 74.4         | 79.0     |
|                               | O <sub>V</sub> | --                 | --       | Pt <sup>2+</sup> | 73.1, 77.2         | 6.0      |
|                               | O <sub>A</sub> | 532.1              | 9.8      | Pt <sup>4+</sup> | 75.4, 78.1         | 14.8     |

**Table S4:** The influence of platinum loading on the product yield

| Entry | Catalyst                   | MLevu          | OMP       | OMP             |
|-------|----------------------------|----------------|-----------|-----------------|
|       |                            | Conversion (%) | Yield (%) | Selectivity (%) |
| 1     | 1wt% Pt/M-ZrO <sub>2</sub> | 58.2           | 3.2       | 5.5             |
| 2     | 2wt% Pt/M-ZrO <sub>2</sub> | 54.4           | 21.1      | 38.8            |
| 3     | 3wt% Pt/M-ZrO <sub>2</sub> | 63.7           | 27.5      | 43.2            |
| 4     | 4wt% Pt/M-ZrO <sub>2</sub> | 67.9           | 19.3      | 28.5            |

Reaction condition: 1 mmol MLevu, mole<sub>substrate:Pt</sub> = 81, 2 mmol octylamine, 19 ml methanol, 30 °C, 30 bar H<sub>2</sub>, 30 min.

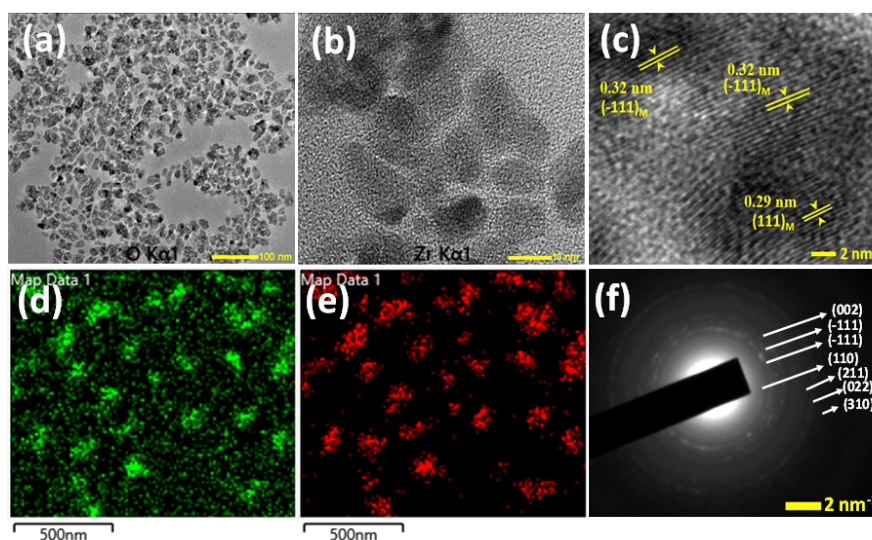

**Figure S1.** HR-TEM images (a-c), TEM-EDX elemental mapping(d,e) and SAED (f) of M-ZrO<sub>2</sub>.

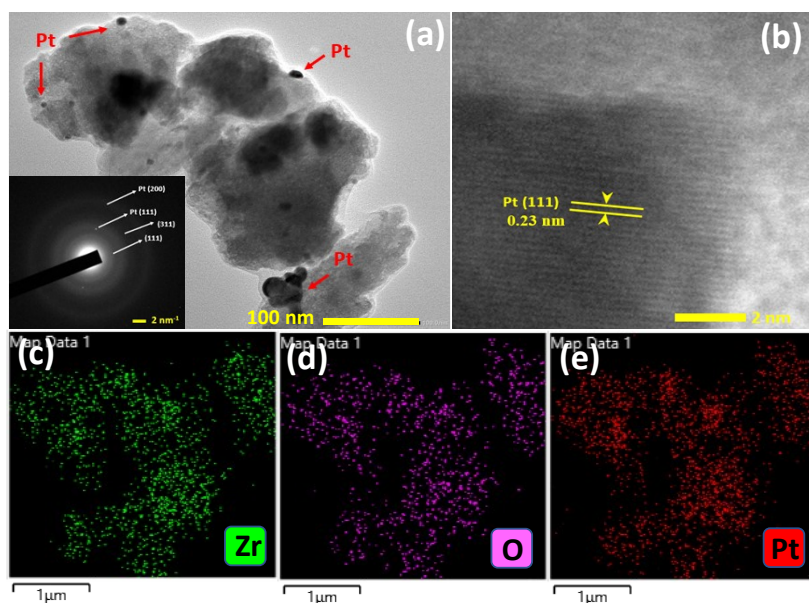

**Figure S2.** HR-TEM images (insert:SAED) (a, b) and TEM-EDX elemental mapping (c-e) of Pt/T-ZrO<sub>2</sub>

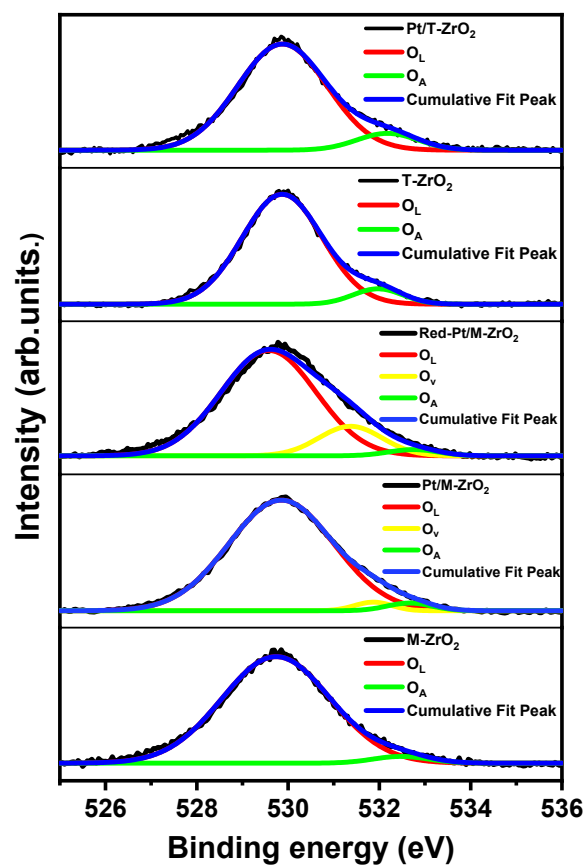

**Figure S3.** XPS spectra of O 1s of a) M-ZrO<sub>2</sub>, b) Pt/M-ZrO<sub>2</sub>, c) Reduced Pt/M-ZrO<sub>2</sub>, d) T-ZrO<sub>2</sub>, e) Pt/T-ZrO<sub>2</sub> after deconvolution.

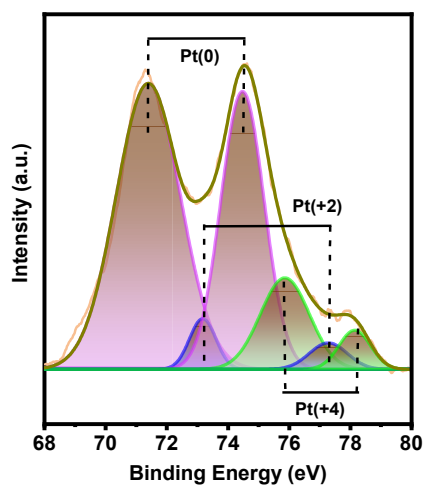

**Figure S4.** XPS spectra of Pt 4f of Pt/T-ZrO<sub>2</sub> after deconvolution.

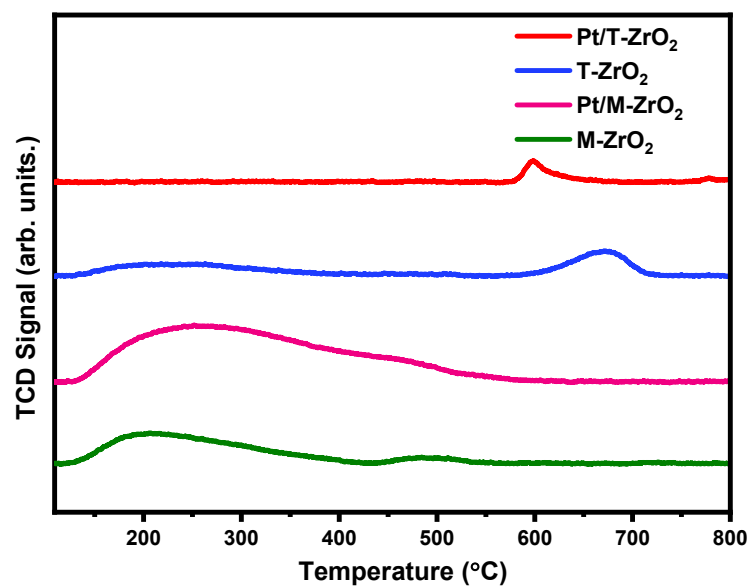

Figure S5. NH<sub>3</sub>-TPD profile of parent and Pt incorporated ZrO<sub>2</sub> catalysts.

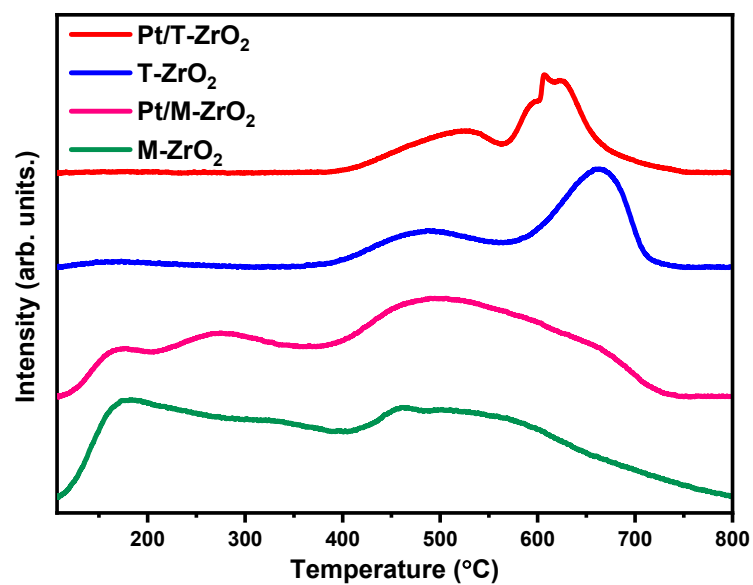

Figure S6. CO<sub>2</sub>-TPD profile of parent and Pt incorporated ZrO<sub>2</sub> catalysts.

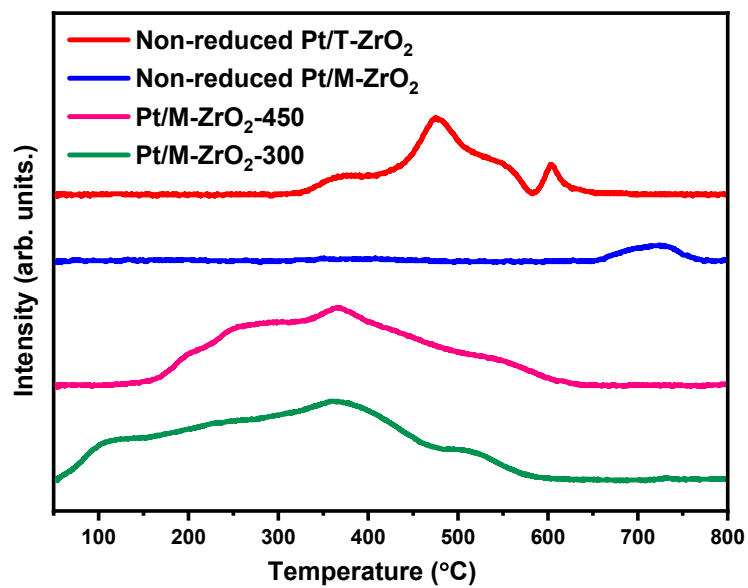

**Figure S7.** H<sub>2</sub>-TPD profile of reduced and nonreduced Pt/ZrO<sub>2</sub> catalysts (Pt/M-ZrO<sub>2</sub>-300: reduced at 300 °C; Pt/M-ZrO<sub>2</sub>-450: reduced at 450 °C).

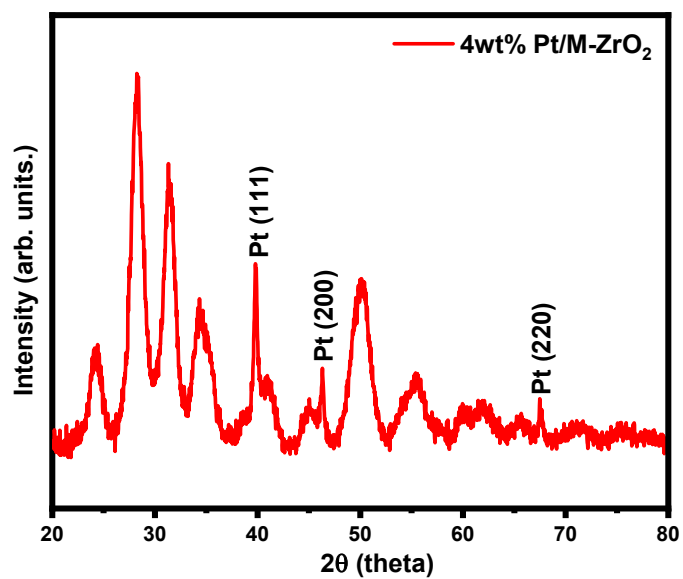

**Figure S8.** XRD pattern of 4 wt% Pt/M-ZrO<sub>2</sub> catalyst.

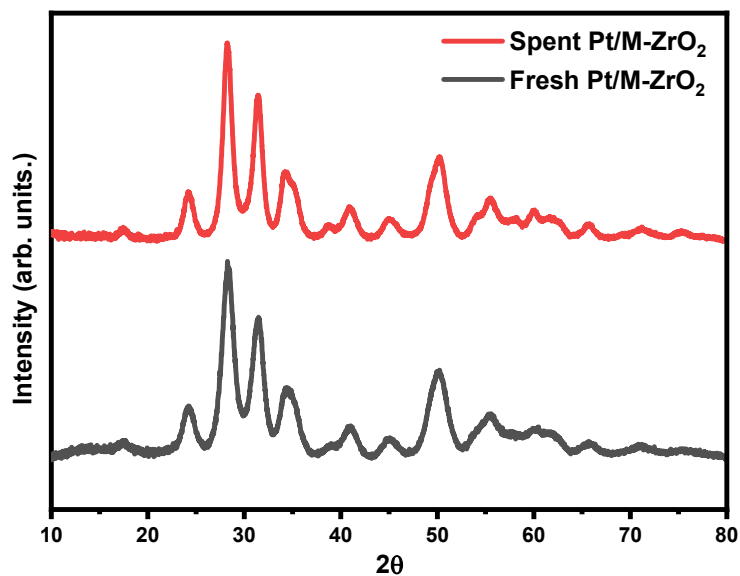

**Figure S9.** XRD pattern of fresh and spent (after four runs) Pt/M-ZrO<sub>2</sub> catalyst.

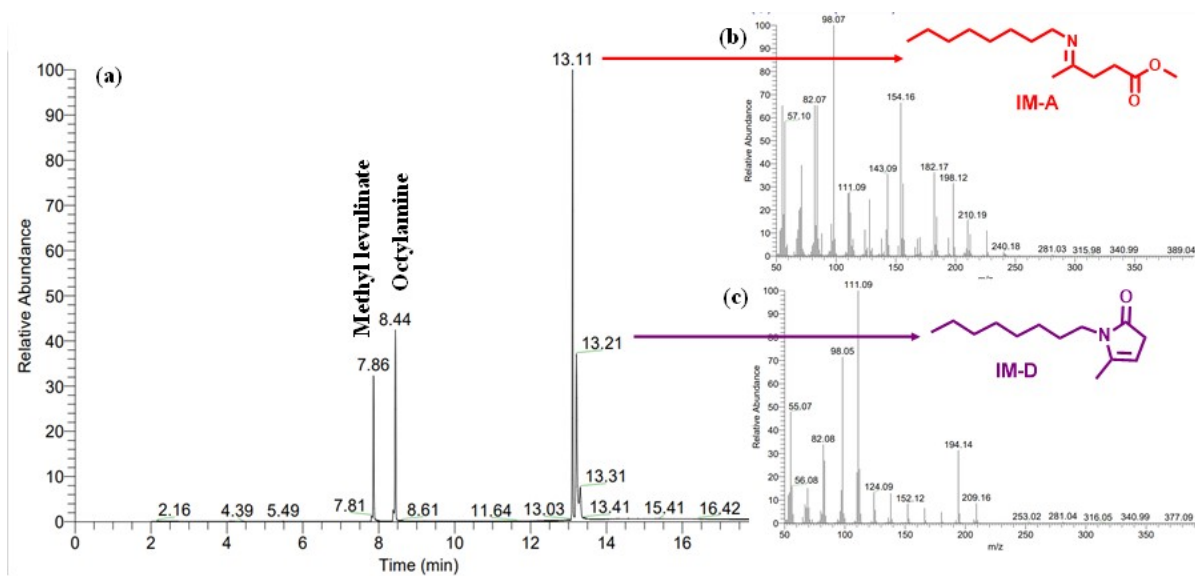

**Figure S10.** GC chromatogram and MS spectra of the reaction mixture. The GC-MS data of the intermediates has been compared with the literature data (Xie et al., *J. Am. Chem. Soc.* 2019, 141, 9, 4002–4009).<sup>[38]</sup>



### Characterization of isolated products using IR, $^1\text{H}$ NMR, $^{13}\text{C}$ NMR, and HRMS:

The  $^1\text{H}$  and  $^{13}\text{C}\{\text{H}\}$  NMR spectra of all compounds have been recorded in 400 and  $\sim 101$  MHz spectrometers using TMS as an internal standard, respectively. The HRMS analysis data of samples reported here were obtained from QTOF mass analyzer by the ESI method. The IR spectra of samples reported here were recorded as neat or thin films. Column chromatography purification of crude reaction mixtures/samples was carried out on alumina. Thin layer chromatography (TLC) analyses were carried out on alumina or silica gel plates. The components of TLC analysis were visualized by observation under iodine vapor.

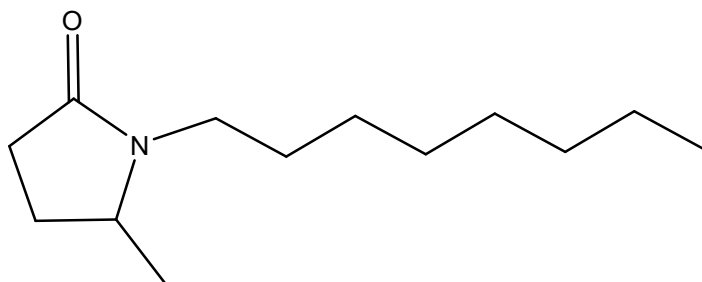

#### 5-Methyl-1-octylpyrrolidin-2-one:

The compound 5-methyl-1-octylpyrrolidin-2-one was obtained after purification by column chromatography on alumina (EtOAc : hexane = 10 : 90) as yellow color liquid (137 mg, 65%, 1 mmol scale);

$R_f$  (10% EtOAc/hexane) 0.5;

IR (DCM): 2920, 1746, 1185  $\text{cm}^{-1}$ ;

$^1\text{H}$  NMR (400 MHz,  $\text{CDCl}_3$ ):  $\delta_H$  3.73-3.65 (1H, m), 3.62-3.54 (1H, m), 2.94-2.87 (1H, m), 2.45-2.28 (2H, m), 2.22-2.13 (1H, m), 1.61-1.49 (2H, m), 1.46-1.39 (1H, m), 1.27-1.27 (10H, m), 1.20 (3H, d,  $J = 6.3$  Hz), 0.88 (3H, t,  $J = 6.3$  Hz).

$^{13}\text{C}$  NMR ( $\sim 101$  MHz,  $\text{CDCl}_3$ ):  $\delta_C$  173.8, 52.5, 39.2, 31.0, 29.5, 28.5, 28.5, 26.7, 26.2, 26.1, 21.9, 19.0, 13.3.

HRMS (ESI):  $m/z$   $[\text{M}+\text{H}]^+$  calcd for  $\text{C}_{13}\text{H}_{26}\text{NO}$ : 212.2014 found 212.2019.

The compound is known in the literature, and the characterization data of this compound was compared with the literature data (Wei et al., *Green Chem.* 2014, 16, 1093-1096).

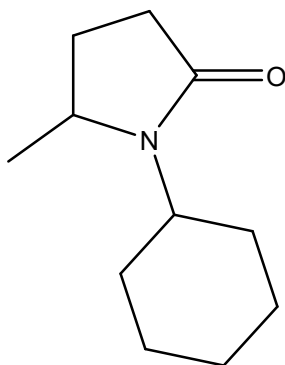

### 1-Cyclohexyl-5-methylpyrrolidin-2-one:

The compound 1-cyclohexyl-5-methylpyrrolidin-2-one was obtained after purification by column chromatography on alumina (EtOAc : hexane = 10 : 90) as yellow color liquid (72 mg, 40%, 1 mmol scale);

R<sub>f</sub> (10% EtOAc/hexane) 0.5;

IR (DCM): 2927, 1748, 1187 cm<sup>-1</sup>;

<sup>1</sup>H NMR (400 MHz, CDCl<sub>3</sub>): δ<sub>H</sub> 3.83-3.66 (2H, m), 2.52-2.42 (1H, m), 2.32-2.22 (1H, m), 2.19-2.09 (1H, m), 1.85-1.75 (3H, m), 1.70-1.63 (3H, m), 1.61-1.55 (1H, m), 1.53-1.46 (1H, m), 1.38-1.32 (2H, m), 1.27-1.24 (3H, m), 1.19-1.08 (1H, m).

<sup>13</sup>C NMR (~101 MHz, CDCl<sub>3</sub>): δ<sub>C</sub> 174.4, 52.8, 52.4, 31.8, 30.3, 30.0, 27.4, 25.9, 25.8, 25.5, 22.4.

HRMS (ESI): *m/z* [M+H]<sup>+</sup> calcd for C<sub>11</sub>H<sub>20</sub>NO: 182.1545 found 182.1549.

The compound is known in the literature, and the characterization data of this compound was compared with the literature data (Wei et al., *Green Chem.* **2014**, *16*, 1093-1096).

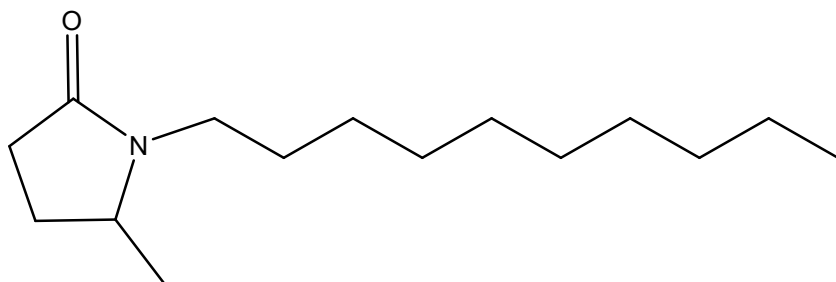

### 1-Decyl-5-methylpyrrolidin-2-one:

(Sample code: KS-P-62)

The compound 1-decyl-5-methylpyrrolidin-2-one was obtained after purification by column chromatography on alumina (EtOAc : hexane = 10 : 90) as yellow color liquid (205 mg, 86%, 1 mmol scale);

R<sub>f</sub> (10% EtOAc/hexane) 0.5;

IR (DCM): 2929, 1748, 1185  $\text{cm}^{-1}$ ;

$^1\text{H}$  NMR (400 MHz,  $\text{CDCl}_3$ ):  $\delta_{\text{H}}$  3.72-3.63 (1H, m), 3.60-3.52 (1H, m), 2.94-2.84 (1H, m), 2.44-2.26 (2H, m), 2.23-2.11 (1H, m), 1.60-1.37 (3H, m), 1.25-1.15 (17H, m), 0.88-0.85 (3H, m).

Proton count: 29

$^{13}\text{C}$  NMR ( $\sim 101$  MHz,  $\text{CDCl}_3$ ):  $\delta_{\text{C}}$  174.3, 52.9, 39.7, 31.7, 30.0, 29.2, 29.2, 29.0, 29.0, 27.1, 26.8, 26.5, 22.4, 19.5, 13.8.

HRMS (ESI):  $m/z$   $[\text{M}+\text{Na}]^+$  calcd for  $\text{C}_{15}\text{H}_{29}\text{NNaO}$ : 262.2147 found 262.2156.

The compound is known in the literature, and the characterization data of this compound was compared with the literature data (Barbaro et al., *Adv. Sustainable Syst.* **2020**, *4*, 1900117).

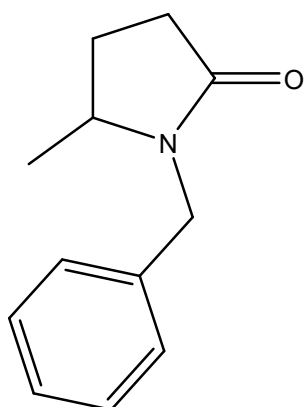

### 1-Benzyl-5-methylpyrrolidin-2-one:

The compound 1-benzyl-5-methylpyrrolidin-2-one was obtained after purification by column chromatography on alumina (EtOAc : hexane = 10 : 90) as yellow color liquid (131 mg, 69%, 1 mmol scale);

$R_{\text{f}}$  (20% EtOAc/hexane) 0.5;

IR (DCM): 3146, 2925, 1738, 1180, 851  $\text{cm}^{-1}$ ;

$^1\text{H}$  NMR (400 MHz,  $\text{CDCl}_3$ ):  $\delta_{\text{H}}$  7.34-7.23 (5H, m), 3.99 (1H, d,  $J = 15.0$  Hz), 4.00 (1H, d,  $J = 15.0$  Hz), 3.56-3.48 (1H, m), 2.54-2.36 (2H, m), 2.20-2.11 (1H, m), 1.64-1.55 (1H, m), 1.16 (3H, d,  $J = 6.3$  Hz).

$^{13}\text{C}$  NMR ( $\sim 101$  MHz,  $\text{CDCl}_3$ ):  $\delta_{\text{C}}$  174.3, 136.3, 128.0, 127.4, 126.8, 52.3, 43.3, 29.7, 26.1, 19.1.

HRMS (ESI):  $m/z$   $[\text{M}+\text{H}]^+$  calcd for  $\text{C}_{12}\text{H}_{16}\text{NO}$ : 190.1232 found 190.1241.

The compound is known in the literature, and the characterization data of this compound was compared with the literature data (Wei et al., *Green Chem.* 2014, 16, 1093-1096).

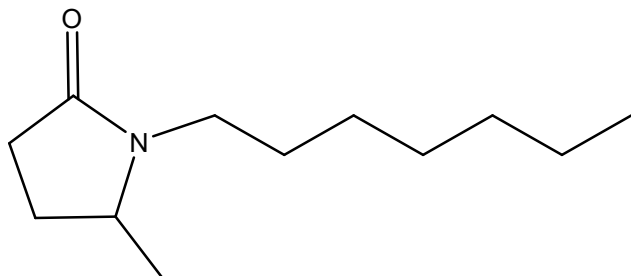

**1-Heptyl-5-methylpyrrolidin-2-one:**

The compound 1-heptyl-5-methylpyrrolidin-2-one was obtained after purification by column chromatography on alumina (EtOAc : hexane = 10 : 90) as yellow color liquid (121 mg, 61%, 1 mmol scale);

R<sub>f</sub> (10% EtOAc/hexane) 0.5;

IR (DCM): 2929, 1748, 1185 cm<sup>-1</sup>;

<sup>1</sup>H NMR (400 MHz, CDCl<sub>3</sub>): δ<sub>H</sub> 3.71-3.60 (1H, m), 3.58-3.48 (1H, m), 2.93-2.82 (1H, m), 2.42-2.24 (2H, m), 2.20-2.07 (1H, m), 1.57-1.34 (3H, m), 1.31-1.13 (11H, m), 0.90-0.79 (3H, m).

<sup>13</sup>C NMR (~101 MHz, CDCl<sub>3</sub>): δ<sub>C</sub> 174.4, 53.0, 39.8, 31.5, 30.1, 28.8, 27.2, 26.7, 26.5, 22.3, 19.5, 13.8.

HRMS (ESI): *m/z* [M+H]<sup>+</sup> calcd for C<sub>12</sub>H<sub>24</sub>NO: 198.1858 found 198.1858.
